# Supplementary material
Source: publisher figshare collection journal article supplement (https://asha.figshare.com/articles/dataset/_/12142059)
Supplement: Supplementary file 1 [file 1]

**Supplemental Material S1.** Comparison between risk of developmental language disorder group (rDLD) and subgroups of rDLD naming vocabulary (rDLD NV) and rDLD parent report (rDLD PR) and general population group (GP).

|                                        | rDLD<br>( <i>n</i> = 891) | rDLD NV<br>( <i>n</i> = 529) | rDLD PR<br>( <i>n</i> = 440) | GP<br>( <i>n</i> = 13,371) | rDLD NV vs GP             | rDLD PR vs. GP            |
|----------------------------------------|---------------------------|------------------------------|------------------------------|----------------------------|---------------------------|---------------------------|
| <i>Demographic variables at age 5</i>  |                           |                              |                              |                            |                           |                           |
| Female (%)                             | 29.4                      | 34.1                         | 24.0                         | 48.5                       | .57(.46, .71)***          | .33(.25, .42)***          |
| Premature (%)                          | 9.8                       | 10.0                         | 8.8                          | 7.3                        | n.s.                      | n.s.                      |
| Poverty Indicator (%)                  | 55.8                      | 66.5                         | 45.9                         | 28.4                       | 5.04(3.91, 6.50)***       | 2.06(1.64, 2.60)***       |
| BAS Naming Vocabulary                  | 38.64 (.53)               | 30.92 (.20)                  | 45.09 (.72)                  | 54.67 (.23)                | -22.73(-23.35, -22.12)*** | -8.82(-10.25, -7.39)***   |
| BAS Pattern Construction               | 40.50 (.62)               | 39.54 (.71)                  | 40.70 (.99)                  | 51.19 (.18)                | -9.56(-11.06, -8.06)***   | -8.08(-10.04, -6.12)***   |
| Age at Wave 3 (in years)               | 5.21                      | 5.26                         | 5.15                         | 5.21                       | 18.87(9.23, 28.50)***     | -22.52(-32.98, -12.07)*** |
| <i>Emotion regulation difficulties</i> |                           |                              |                              |                            |                           |                           |
| Age 3                                  | 2.01 (.02)                | 1.98 (.03)                   | 2.03 (.03)                   | 1.87 (.01)                 | n.s.                      | .11(.06, .17)***          |
| Age 5                                  | 1.91 (.02)                | 1.89 (.02)                   | 1.93 (.03)                   | 1.70 (.01)                 | .08(.03, .13)**           | .16(.10, .21)***          |
| Age 7                                  | 1.91 (.03)                | 1.87 (.03)                   | 1.94 (.03)                   | 1.72 (.01)                 | n.s.                      | .15(.08, .21)***          |
| <i>SDQ Peer Problems</i>               |                           |                              |                              |                            |                           |                           |
| Age 3                                  | 2.11 (.08)                | 2.05 (.11)                   | 2.17 (.10)                   | 1.44 (.02)                 | .17(.06, .28)**           | .30(.21, .39)***          |
| Age 5                                  | 1.68 (.07)                | 1.70 (.09)                   | 1.74 (.09)                   | 1.05 (.02)                 | .25(.13, .37)***          | .33(.21, .45)***          |
| Age 7                                  | 1.83 (.09)                | 1.84 (.11)                   | 1.84 (.11)                   | 1.16 (.02)                 | .24(.10, .38)**           | .31(.18, .44)***          |
| Age 11                                 | 1.96 (.09)                | 1.99 (.11)                   | 2.06 (.13)                   | 1.33 (.02)                 | .21(.10, .32)***          | .25(.13, .38)***          |
| Age 14                                 | 2.24 (.11)                | 2.17 (.14)                   | 2.33 (.15)                   | 1.78 (.03)                 | n.s.                      | .14(.02, .27)*            |
| <i>SDQ Emotional problems</i>          |                           |                              |                              |                            |                           |                           |
| Age 3                                  | 1.77 (.08)                | 1.83 (.11)                   | 1.76 (.10)                   | 1.29 (.02)                 | .20(.07, .32)**           | .23(.12, .33)***          |
| Age 5                                  | 2.10 (.09)                | 2.16 (.13)                   | 2.10 (.11)                   | 1.29 (.02)                 | .38(.24, .51)***          | .40(.29, .51)***          |
| Age 7                                  | 2.19 (.11)                | 2.10 (.15)                   | 2.22 (.13)                   | 1.48 (.02)                 | .19(.03, .35)*            | .34(.22, .47)***          |
| Age 11                                 | 2.48 (.10)                | 2.45 (.12)                   | 2.59 (.15)                   | 1.84 (.03)                 | .18(.07, .28)**           | .26(.14, .38)***          |
| Age 14                                 | 2.58 (.13)                | 2.59 (.18)                   | 2.65 (.18)                   | 2.06 (.04)                 | .17(.03, .32)*            | .27(.12, .43)**           |

Mean scores and standard errors are presented. BAS Naming Vocabulary and BAS Pattern Construction are T Scores ( $M = 50$ ,  $SD = 10$ ). Statistics are beta coefficients (95% confidence interval), controlling for poverty indicator (below 60% median income) and gender. \*\*\* $p < .001$ . \*\* $p < .01$ . \* $p < .05$ .
