# Supplementary material
Source: publisher figshare collection journal article supplement (https://asha.figshare.com/articles/dataset/_/12142059)
Supplement: Supplementary file 2 [file 1]

### Supplemental Material S3. Imputation predictors for each outcome variable.

#### *Imputation for Emotion Regulation variable at age 3*

| Variables in Multiple Imputation Model | Wave | Analysis Model | Correlates of Analysis Variables | Correlates of Missingness | % Non-Missing |
|----------------------------------------|------|----------------|----------------------------------|---------------------------|---------------|
| Mood (temperament)                     | 1    |                | Yes                              |                           | 85.23         |
| Irritability (temperament)             | 1    |                | Yes                              |                           | 90.96         |
| Regularity                             | 1    |                | Yes                              |                           | 89.58         |
| Naming Vocabulary (Age 3)              | 2    |                |                                  | Yes                       | 80.03         |
| Self-regulation (Age 3)                | 2    |                | Yes                              | Yes                       | 77.08         |
| Emotion regulation (Age 5)             | 3    | Yes            | Yes                              |                           | 71.75         |
| Emotion regulation (Age 7)             | 4    | Yes            | Yes                              | Yes                       | 70.15         |
| Child gender                           | 1&2  | Yes            |                                  |                           | 91.09         |
| OECD Poverty Indicator                 | 1&2  | Yes            |                                  | Yes                       | 99.39         |
| SDQ Emotional Subscale Age 3           | 2    | Yes            |                                  | Yes                       | 76.61         |
| Respondent Age                         | 2    |                | Yes                              |                           | 81.01         |
| SDQ Peer Subscale age 3                | 2    | Yes            |                                  |                           | 76.14         |
| SDQ Conduct Subscale age 3             | 2    |                | Yes                              |                           | 76.76         |
| SDQ Hyperactivity Subscale age 3       | 2    |                | Yes                              |                           | 76.03         |
| SDQ Prosocial Subscale age 3           | 2    |                | Yes                              |                           | 76.22         |
| Parental Self Esteem                   | 1    |                | Yes                              |                           | 80.84         |
| Respondent Ethnicity                   | 1    |                | Yes                              | Yes                       | 96.14         |
| Respondent in work                     | 2    |                | Yes                              | Yes                       | 80.30         |
| Respondent Marital Status              | 1    |                | Yes                              | Yes                       | 96.29         |
| Illness/Problem during Pregnancy       | 1    |                |                                  | Yes                       | 96.10         |
| Current Treatment for Depression       | 2    |                |                                  | Yes                       | 81.03         |
| Lived apart from baby (until 9 months) | 1    |                | Yes                              |                           | 96.22         |

*Imputation for Emotion regulation variable at age 5*

| Variables in Multiple Imputation Model | Wave | Analysis Model | Correlates of Analysis Variables | Correlates of Missingness | % Non-Missing |
|----------------------------------------|------|----------------|----------------------------------|---------------------------|---------------|
| Mood (temperament)                     | 1    |                | Yes                              |                           | 85.23         |
| Irritability (temperament)             | 1    |                | Yes                              |                           | 90.96         |
| Regularity                             | 1    |                | Yes                              |                           | 89.58         |
| Naming Vocabulary (Age 3)              | 2    |                | Yes                              |                           | 80.03         |
| Naming Vocabulary (Age 5)              | 3    |                | Yes                              | Yes                       | 77.78         |
| Self-regulation (Age 5)                | 3    |                | Yes                              | Yes                       | 76.78         |
| Emotion regulation (Age 3)             | 2    | Yes            | Yes                              |                           | 69.43         |
| Emotion regulation (Age 7)             | 4    | Yes            | Yes                              |                           | 70.15         |
| Child gender                           | 1&2  | Yes            | Yes                              |                           | 91.09         |
| OECD Poverty Indicator                 | 1&2  | Yes            | Yes                              |                           | 99.39         |
| OECD Poverty Indicator                 | 3    |                | Yes                              | Yes                       | 78.67         |
| SDQ Emotional Subscale Age 3           | 2    | Yes            | Yes                              | Yes                       | 76.61         |
| SDQ Emotional Subscale Age 5           | 3    | Yes            | Yes                              |                           | 76.54         |
| OECD Equivalised income                | 3    |                | Yes                              |                           | 78.43         |
| Respondent Gender                      | 3    |                | Yes                              |                           | 79.24         |
| Respondent Age                         | 3    |                | Yes                              |                           | 79.23         |
| SDQ Peer Subscale age 3                | 2    | Yes            | Yes                              |                           | 76.14         |
| SDQ Peer Subscale age 5                | 3    | Yes            |                                  | Yes                       | 76.49         |
| SDQ Conduct Subscale age 5             | 3    |                | Yes                              |                           | 76.64         |
| SDQ Prosocial Subscale age 5           | 3    |                | Yes                              |                           | 76.63         |
| Parental Self Esteem                   | 1    |                | Yes                              |                           | 80.84         |
| Rutter Malaise Inventory               | 1    |                | Yes                              | Yes                       | 92.51         |
| Languages spoken at home               | 1    |                |                                  | Yes                       | 96.39         |
| Respondent in work                     | 3    |                | Yes                              | Yes                       | 79.24         |
| Respondent Marital Status              | 3    |                | Yes                              | Yes                       | 78.91         |
| Current Treatment for Depression       | 3    |                | Yes                              |                           | 79.24         |
| Lived apart from baby (until 9 months) | 1    |                | Yes                              |                           | 96.22         |
| Longstanding Illness                   | 3    |                | Yes                              |                           | 78.82         |
| Kessler K6 Distress Scale              | 3    |                | Yes                              |                           | 74.49         |

*Imputation for Emotion regulation variable at age 7*

| Variables in Multiple Imputation Model | Wave | Analysis Model | Correlates of Analysis Variables | Correlates of Missingness | % Non-Missing |
|----------------------------------------|------|----------------|----------------------------------|---------------------------|---------------|
| Mood (temperament)                     | 1    |                | Yes                              |                           | 85.23         |
| Irritability (temperament)             | 1    |                | Yes                              |                           | 90.96         |
| Regularity (temperament)               | 1    |                | Yes                              | Yes                       | 89.58         |
| Naming Vocabulary (Age 3)              | 2    |                | Yes                              | Yes                       | 80.03         |
| Naming Vocabulary (Age 5)              | 3    |                | Yes                              | Yes                       | 77.78         |
| Self-regulation (Age 7)                | 4    |                | Yes                              |                           | 70.14         |
| Emotion regulation (Age 3)             | 2    | Yes            | Yes                              |                           | 69.43         |
| Emotion regulation (Age 5)             | 3    | Yes            | Yes                              |                           | 71.75         |
| Child gender                           | 1&2  | Yes            | Yes                              |                           | 91.09         |
| OECD Poverty Indicator                 | 1&2  | Yes            | Yes                              |                           | 99.39         |
| OECD Poverty Indicator                 | 4    |                | Yes                              |                           | 71.97         |
| SDQ Emotional Subscale Age 3           | 2    | Yes            | Yes                              |                           | 76.61         |
| SDQ Emotional Subscale Age 5           | 3    | Yes            | Yes                              |                           | 76.54         |
| SDQ Emotional Subscale Age 7           | 4    | Yes            | Yes                              |                           | 69.91         |
| OECD Equivalised income                | 4    |                | Yes                              | Yes                       | 71.08         |
| Respondent Age                         | 4    |                | Yes                              |                           | 72.08         |
| SDQ Peer Subscale age 3                | 2    | Yes            | Yes                              |                           | 76.14         |
| SDQ Peer Subscale age 5                | 3    | Yes            | Yes                              | Yes                       | 76.49         |
| SDQ Peer Subscale age 7                | 4    | Yes            | Yes                              |                           | 69.95         |
| SDQ Conduct Subscale age 7             | 4    |                | Yes                              |                           | 70.06         |
| SDQ Hyperactivity Subscale age 7       | 4    |                | Yes                              |                           | 69.80         |
| SDQ Prosocial Subscale age 7           | 4    |                | Yes                              |                           | 70.08         |
| Parental Self esteem                   | 1    |                | Yes                              |                           | 80.84         |
| Rutter Malaise Inventory               | 1    |                | Yes                              |                           | 92.51         |
| Languages spoken at home               | 1    |                |                                  | Yes                       | 96.39         |
| Respondent in work                     | 4    |                | Yes                              |                           | 72.08         |
| Respondent Marital Status              | 4    |                | Yes                              |                           | 71.73         |
| Illness/Problem during Pregnancy       | 1    |                | Yes                              | Yes                       | 96.10         |
| Current Treatment for Depression       | 4    |                |                                  | Yes                       | 72.04         |
| Lived apart from baby (until 9 months) | 1    |                | Yes                              |                           | 96.22         |
| Longstanding Illness                   | 4    |                | Yes                              |                           | 71.63         |
| Kessler K6 Distress Scale              | 4    |                | Yes                              |                           | 68.44         |

*Imputation for Peer Problems variable at age 3*

| Variables in Multiple Imputation Model | Wave | Analysis Model | Correlates of Analysis Variables | Correlates of Missingness | % Non-Missing |
|----------------------------------------|------|----------------|----------------------------------|---------------------------|---------------|
| Mood (temperament)                     | 1    |                | Yes                              |                           | 85.23         |
| Irritability (temperament)             | 1    |                | Yes                              |                           | 90.96         |
| Regularity (temperament)               | 1    |                | Yes                              |                           | 89.58         |
| Naming Vocabulary (Age 3)              | 2    |                | Yes                              |                           | 80.03         |
| Self-regulation (Age 3)                | 2    |                | Yes                              | Yes                       | 77.78         |
| Emotion regulation (Age 3)             | 2    | Yes            | Yes                              |                           | 69.43         |
| Child gender                           | 1&2  | Yes            | Yes                              |                           | 91.09         |
| OECD Poverty Indicator                 | 1&2  | Yes            | Yes                              |                           | 99.39         |
| SDQ Emotional Subscale Age 3           | 2    | Yes            | Yes                              | Yes                       | 76.61         |
| Respondent Gender                      | 2    |                | Yes                              |                           | 81.02         |
| Respondent Age                         | 2    |                | Yes                              |                           | 81.01         |
| SDQ Peer Subscale age 5                | 3    | Yes            | Yes                              |                           | 76.49         |
| SDQ Peer Subscale age 7                | 4    | Yes            | Yes                              |                           | 69.95         |
| SDQ Peer Subscale age 11               | 5    | Yes            | Yes                              |                           | 66.57         |
| SDQ Peer Subscale age 14               | 6    | Yes            | Yes                              |                           | 58.95         |
| SDQ Conduct Subscale age 3             | 2    |                | Yes                              | Yes                       | 76.76         |
| SDQ Hyperactivity Subscale age 3       | 2    |                | Yes                              |                           | 76.03         |
| SDQ Prosocial Subscale age 3           | 2    |                | Yes                              |                           | 76.22         |
| Parental Self Esteem                   | 1    |                | Yes                              |                           | 80.84         |
| Rutter Malaise Inventory               | 1    |                | Yes                              |                           | 92.51         |
| Languages spoken at home               | 2    |                | Yes                              |                           | 96.39         |
| Respondent Ethnicity                   | 2    |                | Yes                              |                           | 96.14         |
| Respondent in work                     | 2    |                | Yes                              |                           | 80.30         |
| Respondent Marital Status              | 2    |                | Yes                              |                           | 76.81         |
| Illness/Problem during Pregnancy       | 1    |                | Yes                              |                           | 96.10         |
| Current Treatment for Depression       | 2    |                | Yes                              |                           | 81.03         |
| Lived apart from baby (until 9 months) | 1    |                | Yes                              |                           | 96.22         |
| Longstanding Illness                   | 2    |                | Yes                              |                           | 80.30         |
| Kessler K6 Distress Scale              | 2    |                | Yes                              |                           | 71.59         |

*Imputation for Peer Problems variable at age 5*

| Variables in Multiple Imputation Model | Wave | Analysis Model | Correlates of Analysis Variables | Correlates of Missingness | % Non-Missing |
|----------------------------------------|------|----------------|----------------------------------|---------------------------|---------------|
| Mood (temperament)                     | 1    |                | Yes                              | Yes                       | 85.23         |
| Irritability (temperament)             | 1    |                | Yes                              | Yes                       | 90.96         |
| Regularity (temperament)               | 1    |                | Yes                              | Yes                       | 89.58         |
| Naming Vocabulary (Age 3)              | 2    |                | Yes                              | Yes                       | 80.03         |
| Naming Vocabulary (Age 5)              | 3    |                | Yes                              |                           | 77.78         |
| Self-regulation (Age 3)                | 2    |                | Yes                              |                           | 77.08         |
| Self-regulation (Age 5)                | 3    |                | Yes                              |                           | 76.78         |
| Emotion regulation (Age 3)             | 2    | Yes            | Yes                              |                           | 69.43         |
| Emotion regulation (Age 5)             | 3    | Yes            | Yes                              |                           | 71.75         |
| Child gender                           | 1&2  | Yes            | Yes                              |                           | 91.09         |
| OECD Poverty Indicator                 | 1&2  | Yes            | Yes                              | Yes                       | 99.39         |
| OECD Poverty Indicator                 | 3    |                | Yes                              | Yes                       | 78.67         |
| SDQ Emotional Subscale Age 3           | 2    | Yes            | Yes                              | Yes                       | 76.61         |
| SDQ Emotional Subscale Age 5           | 3    | Yes            | Yes                              |                           | 76.54         |
| OECD Equivalised income                | 3    |                | Yes                              |                           | 78.43         |
| Respondent Gender                      | 3    |                | Yes                              | Yes                       | 79.24         |
| Respondent Age                         | 3    |                | Yes                              | Yes                       | 96.39         |
| SDQ Peer Subscale age 3                | 2    | Yes            | Yes                              | Yes                       | 79.23         |
| SDQ Peer Subscale age 7                | 4    | Yes            | Yes                              |                           | 69.95         |
| SDQ Peer Subscale age 11               | 5    | Yes            | Yes                              |                           | 66.57         |
| SDQ Peer Subscale age 14               | 6    | Yes            | Yes                              |                           | 58.95         |
| SDQ Conduct Subscale age 5             | 3    |                | Yes                              | Yes                       | 76.64         |
| SDQ Hyperactivity Subscale age 5       | 3    |                | Yes                              |                           | 76.19         |
| SDQ Prosocial Subscale age 5           | 3    |                | Yes                              |                           | 76.63         |
| Parental Self Esteem                   | 1    |                | Yes                              |                           | 80.84         |
| Rutter Malaise Inventory               | 1    |                | Yes                              |                           | 92.51         |
| Languages spoken at home               | 1    |                | Yes                              |                           | 96.39         |
| Respondent Ethnicity                   | 1    |                | Yes                              | Yes                       | 96.14         |
| Respondent in work                     | 3    |                | Yes                              | Yes                       | 79.24         |
| Respondent Marital Status              | 3    |                | Yes                              | Yes                       | 78.91         |
| Illness/Problem during Pregnancy       | 1    |                | Yes                              |                           | 96.10         |
| Current Treatment for Depression       | 3    |                | Yes                              |                           | 79.24         |
| Lived apart from baby (until 9 months) | 1    |                | Yes                              |                           | 96.22         |
| Longstanding Illness                   | 3    |                | Yes                              |                           | 78.82         |
| Kessler K6 Distress Scale              | 3    |                | Yes                              | Yes                       | 74.49         |

*Imputation for Peer Problems variable at age 7*

| Variables in Multiple Imputation Model | Wave | Analysis Model | Correlates of Analysis Variables | Correlates of Missingness | % Non-Missing |
|----------------------------------------|------|----------------|----------------------------------|---------------------------|---------------|
| Mood (temperament)                     | 1    |                | Yes                              |                           | 85.23         |
| Irritability (temperament)             | 1    |                | Yes                              |                           | 90.96         |
| Regularity (temperament)               | 1    |                | Yes                              |                           | 89.58         |
| Naming Vocabulary (Age 3)              | 2    |                | Yes                              |                           | 80.03         |
| Naming Vocabulary (Age 5)              | 3    |                | Yes                              | Yes                       | 77.78         |
| Self-regulation (Age 3)                | 2    |                | Yes                              |                           | 77.08         |
| Self-regulation (Age 5)                | 3    |                | Yes                              | Yes                       | 76.78         |
| Self-regulation (Age 7)                | 4    |                | Yes                              | Yes                       | 70.14         |
| Emotion regulation (Age 3)             | 2    | Yes            | Yes                              |                           | 69.43         |
| Emotion regulation (Age 5)             | 3    | Yes            | Yes                              | Yes                       | 71.75         |
| Emotion regulation (Age 7)             | 4    | Yes            | Yes                              | Yes                       | 70.15         |
| Child gender                           | 1&2  | Yes            | Yes                              |                           | 91.09         |
| OECD Poverty Indicator                 | 1&2  | Yes            | Yes                              | Yes                       | 99.39         |
| OECD Poverty Indicator                 | 4    |                | Yes                              | Yes                       | 71.97         |
| SDQ Emotional Subscale Age 3           | 2    | Yes            | Yes                              |                           | 76.61         |
| SDQ Emotional Subscale Age 5           | 3    | Yes            | Yes                              | Yes                       | 76.54         |
| SDQ Emotional Subscale Age 7           | 4    | Yes            | Yes                              |                           | 69.91         |
| OECD Equivalised income                | 4    |                | Yes                              | Yes                       | 71.08         |
| Respondent Gender                      | 4    |                |                                  | Yes                       | 72.08         |
| Respondent Age                         | 4    |                | Yes                              | Yes                       | 72.08         |
| SDQ Peer Subscale age 3                | 2    | Yes            | Yes                              |                           | 76.14         |
| SDQ Peer Subscale age 5                | 3    | Yes            | Yes                              | Yes                       | 76.49         |
| SDQ Peer Subscale age 11               | 5    | Yes            | Yes                              |                           | 66.57         |
| SDQ Peer Subscale age 14               | 6    | Yes            | Yes                              |                           | 58.95         |
| SDQ Conduct Subscale age 7             | 4    |                | Yes                              |                           | 70.06         |
| SDQ Hyperactivity Subscale age 7       | 4    |                | Yes                              |                           | 69.80         |
| SDQ Prosocial Subscale age 7           | 4    |                | Yes                              | Yes                       | 70.08         |
| Parental Self esteem                   | 1    |                | Yes                              |                           | 80.84         |
| Rutter Malaise Inventory               | 1    |                | Yes                              |                           | 92.51         |
| Languages spoken at home               | 1    |                | Yes                              | Yes                       | 96.39         |
| Respondent Ethnicity                   | 1    |                | Yes                              |                           | 96.14         |
| Respondent in work                     | 4    |                | Yes                              | Yes                       | 72.08         |
| Respondent Marital Status              | 4    |                | Yes                              |                           | 71.73         |
| Illness/Problem during Pregnancy       | 1    |                | Yes                              |                           | 96.10         |
| Current Treatment for Depression       | 4    |                | Yes                              | Yes                       | 72.04         |
| Longstanding Illness                   | 4    |                | Yes                              |                           | 71.63         |
| Kessler K6 Distress Scale              | 4    |                | Yes                              |                           | 68.44         |

*Imputation for Peer Problems variable at age 11*

| Variables in Multiple Imputation Model | Wave | Analysis Model | Correlates of Analysis Variables | Correlates of Missingness | % Non-Missing |
|----------------------------------------|------|----------------|----------------------------------|---------------------------|---------------|
| Irritability (temperament)             | 1    |                | Yes                              |                           | 90.96         |
| Regularity (temperament)               | 1    |                | Yes                              |                           | 89.58         |
| Naming Vocabulary (Age 3)              | 2    |                | Yes                              | Yes                       | 80.03         |
| Naming Vocabulary (Age 5)              | 3    |                | Yes                              | Yes                       | 77.78         |
| Emotion regulation (Age 3)             | 2    | Yes            | Yes                              | Yes                       | 69.43         |
| Emotion regulation (Age 5)             | 3    | Yes            | Yes                              |                           | 71.75         |
| Emotion regulation (Age 7)             | 4    | Yes            | Yes                              |                           | 70.15         |
| Child gender                           | 1&2  | Yes            | Yes                              |                           | 91.09         |
| OECD Poverty Indicator                 | 1&2  | Yes            | Yes                              | Yes                       | 99.39         |
| OECD Poverty Indicator                 | 5    |                | Yes                              | Yes                       | 69.08         |
| SDQ Emotional Subscale Age 3           | 2    | Yes            | Yes                              |                           | 76.61         |
| SDQ Emotional Subscale Age 5           | 3    | Yes            | Yes                              | Yes                       | 76.54         |
| SDQ Emotional Subscale Age 7           | 4    | Yes            | Yes                              |                           | 69.91         |
| SDQ Emotional Subscale Age 11          | 5    | Yes            | Yes                              |                           | 66.53         |
| OECD Equivalised income                | 5    |                | Yes                              | Yes                       | 69.08         |
| Respondent Gender                      | 5    |                | Yes                              |                           | 66.58         |
| Respondent Age                         | 5    |                | Yes                              |                           | 66.58         |
| SDQ Peer Subscale age 3                | 2    | Yes            | Yes                              |                           | 76.14         |
| SDQ Peer Subscale age 5                | 3    | Yes            | Yes                              | Yes                       | 76.49         |
| SDQ Peer Subscale age 7                | 4    | Yes            | Yes                              |                           | 69.95         |
| SDQ Peer Subscale age 14               | 6    | Yes            | Yes                              |                           | 58.95         |
| SDQ Conduct Subscale age 11            | 5    |                | Yes                              |                           | 66.54         |
| SDQ Hyperactivity Subscale age 11      | 5    |                | Yes                              |                           | 66.40         |
| SDQ Prosocial Subscale age 11          | 5    |                | Yes                              |                           | 66.58         |
| Parental Self esteem                   | 1    |                | Yes                              |                           | 80.84         |
| Rutter Malaise Inventory               | 1    |                | Yes                              |                           | 92.51         |
| Languages spoken at home               | 1    |                |                                  | Yes                       | 96.39         |
| Respondent Ethnicity                   | 1    |                | Yes                              |                           | 96.14         |
| Respondent in work                     | 5    |                | Yes                              | Yes                       | 66.58         |
| Respondent Marital Status              | 5    |                | Yes                              | Yes                       | 64.98         |
| Illness/Problem during Pregnancy       | 1    |                | Yes                              |                           | 96.10         |
| Current Treatment for Depression       | 5    |                | Yes                              | Yes                       | 66.58         |
| Lived apart from baby (until 9 months) | 1    |                | Yes                              |                           | 96.22         |
| Longstanding Illness                   | 5    |                | Yes                              |                           | 66.04         |
| Kessler K6 Distress Scale              | 5    |                | Yes                              | Yes                       | 60.86         |

*Imputation for Peer Problems variable at age 14*

| Variables in Multiple Imputation Model | Wave | Analysis Model | Correlates of Analysis Variables | Correlates of Missingness | % Non-Missing |
|----------------------------------------|------|----------------|----------------------------------|---------------------------|---------------|
| Irritability (temperament)             | 1    |                | Yes                              |                           | 90.96         |
| Regularity (temperament)               | 1    |                | Yes                              |                           | 89.58         |
| Naming Vocabulary (Age 3)              | 2    |                | Yes                              | Yes                       | 80.03         |
| Naming Vocabulary (Age 5)              | 3    |                | Yes                              |                           | 77.78         |
| Self-regulation (Age 3)                | 3    |                | Yes                              |                           | 77.08         |
| Self-regulation (Age 5)                | 4    |                | Yes                              |                           | 76.78         |
| Self-regulation (Age 7)                | 5    |                | Yes                              |                           | 70.14         |
| Emotion regulation (Age 3)             | 2    | Yes            | Yes                              |                           | 69.43         |
| Emotion regulation (Age 5)             | 3    | Yes            | Yes                              |                           | 71.75         |
| Emotion regulation (Age 7)             | 4    | Yes            | Yes                              |                           | 70.15         |
| Child gender                           | 1&2  | Yes            | Yes                              |                           | 91.09         |
| OECD Poverty Indicator                 | 1&2  | Yes            | Yes                              |                           | 99.39         |
| OECD Poverty Indicator                 | 6    |                | Yes                              |                           | 60.92         |
| SDQ Emotional Subscale Age 3           | 2    | Yes            | Yes                              |                           | 76.61         |
| SDQ Emotional Subscale Age 5           | 3    | Yes            | Yes                              |                           | 76.54         |
| SDQ Emotional Subscale Age 7           | 4    | Yes            | Yes                              |                           | 69.91         |
| SDQ Emotional Subscale Age 11          | 5    | Yes            | Yes                              |                           | 66.53         |
| SDQ Emotional Subscale Age 14          | 6    | Yes            | Yes                              |                           | 58.92         |
| OECD Equivalised income                | 6    |                | Yes                              |                           | 60.92         |
| Respondent Age                         | 6    |                | Yes                              |                           | 58.28         |
| SDQ Peer Subscale age 3                | 2    | Yes            | Yes                              |                           | 76.14         |
| SDQ Peer Subscale age 5                | 3    | Yes            | Yes                              |                           | 76.49         |
| SDQ Peer Subscale age 7                | 4    | Yes            | Yes                              |                           | 69.95         |
| SDQ Peer Subscale age 11               | 5    | Yes            | Yes                              |                           | 66.57         |
| SDQ Conduct Subscale age 14            | 6    |                | Yes                              |                           | 58.93         |
| SDQ Hyperactivity Subscale age 14      | 6    |                | Yes                              |                           | 58.90         |
| SDQ Prosocial Subscale age 14          | 6    |                | Yes                              |                           | 58.94         |
| Parental Self esteem                   | 1    |                | Yes                              |                           | 80.84         |
| Rutter Malaise Inventory               | 1    |                | Yes                              |                           | 92.51         |
| Respondent Ethnicity                   | 1    |                |                                  | Yes                       | 96.14         |
| Respondent in work                     | 6    |                | Yes                              |                           | 58.29         |
| Respondent Marital Status              | 6    |                | Yes                              |                           | 56.86         |
| Illness/Problem during Pregnancy       | 1    |                | Yes                              |                           | 96.10         |
| Current Treatment for Depression       | 6    |                | Yes                              |                           | 57.20         |
| Lived apart from baby (until 9 months) | 1    |                | Yes                              |                           | 96.22         |
| Longstanding Illness                   | 6    |                | Yes                              |                           | 57.19         |
| Kessler K6 Distress Scale              | 6    |                | Yes                              |                           | 53.92         |



*Imputation for Emotional Problems variable age 3*

| Variables in Multiple Imputation Model | Wave | Analysis Model | Correlates of Analysis Variables | Correlates of Missingness | % Non-Missing |
|----------------------------------------|------|----------------|----------------------------------|---------------------------|---------------|
| Mood (temperament)                     | 1    |                | Yes                              |                           | 85.23         |
| Irritability (temperament)             | 1    |                | Yes                              |                           | 90.96         |
| Regularity (temperament)               | 1    |                | Yes                              | Yes                       | 89.58         |
| Naming Vocabulary (Age 3)              | 2    | Yes            | Yes                              |                           | 80.03         |
| Self-regulation (Age 3)                | 2    |                | Yes                              |                           | 77.08         |
| Emotion regulation (Age 3)             | 2    | Yes            | Yes                              |                           | 69.43         |
| Child gender                           | 1&2  | Yes            |                                  |                           | 91.09         |
| OECD Poverty Indicator                 | 1&2  | Yes            | Yes                              |                           | 99.39         |
| SDQ Emotional Subscale Age 5           | 3    | Yes            | Yes                              |                           | 76.54         |
| SDQ Emotional Subscale Age 7           | 4    | Yes            | Yes                              |                           | 69.91         |
| SDQ Emotional Subscale Age 11          | 5    | Yes            | Yes                              |                           | 66.53         |
| SDQ Emotional Subscale Age 14          | 6    | Yes            | Yes                              |                           | 58.92         |
| Respondent Gender                      | 2    |                |                                  | Yes                       | 81.02         |
| Respondent Age                         | 2    |                | Yes                              |                           | 81.01         |
| SDQ Peer Subscale age 3                | 2    | Yes            | Yes                              |                           | 76.14         |
| SDQ Conduct Subscale age 3             | 2    |                | Yes                              | Yes                       | 76.76         |
| SDQ Hyperactivity Subscale age 3       | 2    |                | Yes                              | Yes                       | 76.03         |
| SDQ Prosocial Subscale age 3           | 2    |                | Yes                              |                           | 76.22         |
| Parental Self esteem                   | 1    |                | Yes                              |                           | 80.84         |
| Rutter Malaise Inventory               | 1    |                | Yes                              |                           | 92.51         |
| Languages spoken at home               | 1    |                | Yes                              | Yes                       | 96.39         |
| Respondent Ethnicity                   | 1    |                | Yes                              |                           | 96.14         |
| Respondent in work                     | 2    |                | Yes                              | Yes                       | 80.30         |
| Respondent Marital Status              | 2    |                |                                  | Yes                       | 76.81         |
| Illness/Problem during Pregnancy       | 1    |                | Yes                              | Yes                       | 96.10         |
| Current Treatment for Depression       | 2    |                | Yes                              |                           | 81.03         |
| Lived apart from baby (until 9 months) | 1    |                | Yes                              |                           | 96.22         |
| Longstanding Illness                   | 2    |                | Yes                              |                           | 80.30         |
| Kessler K6 Distress Scale              | 2    |                | Yes                              |                           | 71.59         |

*Imputation for Emotional Problems variable age 5*

| Variables in Multiple Imputation Model | Wave | Analysis Model | Correlates of Analysis Variables | Correlates of Missingness | % Non-Missing |
|----------------------------------------|------|----------------|----------------------------------|---------------------------|---------------|
| Mood (temperament)                     | 1    |                | Yes                              | Yes                       | 85.23         |
| Irritability (temperament)             | 1    |                | Yes                              | Yes                       | 90.96         |
| Approach/withdrawal (temperament)      | 1    |                | Yes                              |                           | 67.36         |
| Regularity (temperament)               | 1    |                | Yes                              | Yes                       | 89.58         |
| Adaptability (temperament)             | 1    |                | Yes                              |                           | 78.52         |
| Maternal Attachment                    | 1    |                | Yes                              |                           | 79.54         |
| Naming Vocabulary (Age 3)              | 2    | Yes            | Yes                              | Yes                       | 80.03         |
| Naming Vocabulary (Age 5)              | 3    |                | Yes                              | Yes                       | 77.78         |
| Self-regulation (Age 3)                | 2    |                | Yes                              | Yes                       | 77.08         |
| Self-regulation (Age 5)                | 3    |                | Yes                              | Yes                       | 76.78         |
| Emotion regulation (Age 3)             | 2    | Yes            | Yes                              |                           | 69.43         |
| Emotion regulation (Age 5)             | 3    | Yes            | Yes                              |                           | 71.75         |
| Child gender                           | 1&2  | Yes            | Yes                              |                           | 91.09         |
| OECD Poverty Indicator                 | 1&2  | Yes            | Yes                              |                           | 99.39         |
| OECD Poverty Indicator                 | 3    |                | Yes                              | Yes                       | 78.67         |
| SDQ Emotional Subscale Age 3           | 2    | Yes            | Yes                              | Yes                       | 76.61         |
| SDQ Emotional Subscale Age 7           | 4    | Yes            | Yes                              |                           | 69.91         |
| SDQ Emotional Subscale Age 11          | 5    | Yes            | Yes                              |                           | 66.53         |
| SDQ Emotional Subscale Age 14          | 6    | Yes            | Yes                              |                           | 58.92         |
| OECD Equivalised income                | 3    |                | Yes                              | Yes                       | 78.43         |
| Respondent Age                         | 3    |                | Yes                              |                           | 79.23         |
| SDQ Peer Subscale age 3                | 2    | Yes            | Yes                              |                           | 76.14         |
| SDQ Peer Subscale age 5                | 3    | Yes            | Yes                              |                           | 76.49         |
| SDQ Conduct Subscale age 5             | 3    |                | Yes                              | Yes                       | 76.64         |
| SDQ Hyperactivity Subscale age 5       | 3    |                | Yes                              |                           | 76.19         |
| SDQ Prosocial Subscale age 5           | 3    |                | Yes                              |                           | 76.63         |
| Parental Self esteem                   | 1    |                | Yes                              |                           | 80.84         |
| Rutter Malaise Inventory               | 1    |                | Yes                              |                           | 92.51         |
| Languages spoken at home               | 1    |                | Yes                              |                           | 96.39         |
| Respondent Ethnicity                   | 1    |                | Yes                              |                           | 96.14         |
| Respondent in work                     | 3    |                | Yes                              |                           | 79.24         |
| Respondent Marital Status              | 3    |                | Yes                              | Yes                       | 78.91         |
| Illness/Problem during Pregnancy       | 1    |                | Yes                              |                           | 96.10         |
| Current Treatment for Depression       | 3    |                | Yes                              |                           | 79.24         |
| Lived apart from baby (until 9 months) | 1    |                | Yes                              |                           | 96.22         |
| Longstanding Illness                   | 3    |                | Yes                              |                           | 78.82         |
| Kessler K6 Distress Scale              | 3    |                | Yes                              |                           | 74.49         |

*Imputation for Emotional Problems variable age 7*

| Variables in Multiple Imputation Model | Wave | Analysis Model | Correlates of Analysis Variables | Correlates of Missingness | % Non-Missing |
|----------------------------------------|------|----------------|----------------------------------|---------------------------|---------------|
| Mood (temperament)                     | 1    |                | Yes                              |                           | 85.23         |
| Irritability (temperament)             | 1    |                | Yes                              |                           | 90.96         |
| Regularity (temperament)               | 1    |                | Yes                              |                           | 89.58         |
| Naming Vocabulary (Age 3)              | 2    | Yes            | Yes                              | Yes                       | 80.03         |
| Naming Vocabulary (Age 5)              | 3    |                | Yes                              | Yes                       | 77.78         |
| Self-regulation (Age 3)                | 2    |                | Yes                              | Yes                       | 77.08         |
| Self-regulation (Age 5)                | 3    |                | Yes                              | Yes                       | 76.78         |
| Self-regulation (Age 7)                | 4    |                | Yes                              |                           | 70.14         |
| Emotion regulation (Age 3)             | 2    | Yes            | Yes                              |                           | 69.43         |
| Emotion regulation (Age 5)             | 3    | Yes            | Yes                              |                           | 71.75         |
| Emotion regulation (Age 7)             | 4    | Yes            | Yes                              |                           | 70.15         |
| Child gender                           | 1&2  | Yes            |                                  |                           | 91.09         |
| OECD Poverty Indicator                 | 1&2  | Yes            | Yes                              |                           | 99.39         |
| OECD Poverty Indicator                 | 4    |                | Yes                              | Yes                       | 71.97         |
| SDQ Emotional Subscale Age 3           | 2    | Yes            | Yes                              | Yes                       | 76.61         |
| SDQ Emotional Subscale Age 5           | 3    | Yes            | Yes                              | Yes                       | 76.54         |
| SDQ Emotional Subscale Age 11          | 5    | Yes            | Yes                              |                           | 66.53         |
| SDQ Emotional Subscale Age 14          | 6    | Yes            | Yes                              |                           | 58.92         |
| OECD Equivalised income                | 4    |                | Yes                              |                           | 71.08         |
| Respondent Age                         | 4    |                | Yes                              |                           | 72.08         |
| SDQ Peer Subscale age 3                | 2    | Yes            | Yes                              |                           | 76.14         |
| SDQ Peer Subscale age 5                | 3    | Yes            | Yes                              | Yes                       | 76.49         |
| SDQ Peer Subscale age 7                | 4    | Yes            | Yes                              |                           | 69.95         |
| SDQ Conduct Subscale age 7             | 4    |                | Yes                              |                           | 70.06         |
| SDQ Hyperactivity Subscale age 7       | 4    |                | Yes                              | Yes                       | 69.80         |
| SDQ Prosocial Subscale age 7           | 4    |                | Yes                              |                           | 70.08         |
| Parental Self esteem                   | 1    |                | Yes                              |                           | 80.84         |
| Rutter Malaise Inventory               | 1    |                | Yes                              |                           | 92.51         |
| Languages spoken at home               | 1    |                | Yes                              | Yes                       | 96.39         |
| Respondent in work                     | 4    |                | Yes                              |                           | 72.08         |
| Respondent Marital Status              | 4    |                | Yes                              |                           | 71.73         |
| Illness/Problem during Pregnancy       | 1    |                | Yes                              |                           | 96.10         |
| Current Treatment for Depression       | 4    |                | Yes                              | Yes                       | 72.04         |
| Lived apart from baby (until 9 months) | 1    |                | Yes                              |                           | 96.22         |
| Longstanding Illness                   | 4    |                | Yes                              |                           | 71.63         |
| Kessler K6 Distress Scale              | 4    |                | Yes                              |                           | 68.44         |

*Imputation for Emotional Problems variable age 11*

| Variables in Multiple Imputation Model | Wave | Analysis Model | Correlates of Analysis Variables | Correlates of Missingness | % Non-Missing |
|----------------------------------------|------|----------------|----------------------------------|---------------------------|---------------|
| Mood (temperament)                     | 1    |                | Yes                              |                           | 85.23         |
| Irritability (temperament)             | 1    |                | Yes                              |                           | 90.96         |
| Regularity (temperament)               | 1    |                | Yes                              |                           | 89.58         |
| Parenting beliefs                      | 1    |                |                                  |                           |               |
| Naming Vocabulary (Age 3)              | 2    | Yes            | Yes                              |                           | 80.03         |
| Naming Vocabulary (Age 5)              | 3    |                | Yes                              |                           | 77.78         |
| Self-regulation (Age 3)                | 2    |                | Yes                              |                           | 77.08         |
| Self-regulation (Age 5)                | 3    |                | Yes                              |                           | 76.78         |
| Self-regulation (Age 7)                | 4    |                | Yes                              |                           | 70.14         |
| Emotion regulation (Age 3)             | 2    | Yes            | Yes                              |                           | 69.43         |
| Emotion regulation (Age 5)             | 3    | Yes            | Yes                              |                           | 71.75         |
| Emotion regulation (Age 7)             | 4    | Yes            | Yes                              |                           | 70.15         |
| Child gender                           | 1&2  | Yes            | Yes                              | Yes                       | 91.09         |
| OECD Poverty Indicator                 | 1&2  | Yes            | Yes                              | Yes                       | 99.39         |
| OECD Poverty Indicator                 | 5    |                | Yes                              | Yes                       | 69.08         |
| SDQ Emotional Subscale Age 3           | 2    | Yes            | Yes                              |                           | 76.61         |
| SDQ Emotional Subscale Age 5           | 3    | Yes            | Yes                              |                           | 76.54         |
| SDQ Emotional Subscale Age 7           | 4    | Yes            | Yes                              | Yes                       | 69.91         |
| SDQ Emotional Subscale Age 14          | 6    | Yes            | Yes                              |                           | 58.92         |
| OECD Equivalised income                | 5    |                | Yes                              | Yes                       | 69.08         |
| Respondent Gender                      | 5    |                |                                  | Yes                       | 66.58         |
| Respondent Age                         | 5    |                | Yes                              |                           | 66.58         |
| SDQ Peer Subscale age 3                | 2    | Yes            | Yes                              |                           | 76.14         |
| SDQ Peer Subscale age 5                | 3    | Yes            | Yes                              |                           | 76.49         |
| SDQ Peer Subscale age 7                | 4    | Yes            | Yes                              |                           | 69.95         |
| SDQ Peer Subscale age 11               | 5    | Yes            | Yes                              |                           | 66.57         |
| SDQ Conduct Subscale age 11            | 5    |                | Yes                              |                           | 66.54         |
| SDQ Hyperactivity Subscale age 11      | 5    |                | Yes                              |                           | 66.40         |
| SDQ Prosocial Subscale age 11          | 5    |                | Yes                              |                           | 66.58         |
| Parental Self Esteem                   | 1    |                | Yes                              |                           | 80.84         |
| Rutter Malaise Inventory               | 1    |                | Yes                              |                           | 92.51         |
| Languages spoken at home               | 1    |                |                                  | Yes                       | 96.39         |
| Respondent Ethnicity                   | 1    |                | Yes                              |                           | 96.14         |
| Respondent in work                     | 5    |                | Yes                              | Yes                       | 66.58         |
| Respondent Marital Status              | 5    |                | Yes                              | Yes                       |               |
| Illness/Problem during Pregnancy       | 1    |                | Yes                              |                           | 96.10         |
| Current Treatment for Depression       | 5    |                | Yes                              | Yes                       | 66.58         |
| Lived apart from baby (until 9 months) | 1    |                | Yes                              |                           | 96.22         |
| Longstanding Illness                   | 5    |                | Yes                              | Yes                       | 66.04         |
| Kessler K6 Distress Scale              | 5    |                | Yes                              | Yes                       | 60.86         |

*Imputation for Emotional Problems variable age 14*

| Variables in Multiple Imputation Model | Wave | Analysis Model | Correlates of Analysis Variables | Correlates of Missingness | % Non-Missing |
|----------------------------------------|------|----------------|----------------------------------|---------------------------|---------------|
| Mood (temperament)                     | 1    |                | Yes                              |                           | 85.23         |
| Irritability (temperament)             | 1    |                | Yes                              |                           | 90.96         |
| Regularity (temperament)               | 1    |                | Yes                              |                           | 89.58         |
| Naming Vocabulary (Age 3)              | 2    | Yes            | Yes                              | Yes                       | 80.03         |
| Naming Vocabulary (Age 5)              | 3    |                | Yes                              |                           | 77.78         |
| Self-regulation (Age 3)                | 2    |                | Yes                              |                           | 77.08         |
| Self-regulation (Age 5)                | 3    |                | Yes                              |                           | 76.78         |
| Self-regulation (Age 7)                | 4    |                | Yes                              |                           | 70.14         |
| Emotion regulation (Age 3)             | 2    | Yes            | Yes                              |                           | 69.43         |
| Emotion regulation (Age 5)             | 3    | Yes            | Yes                              |                           | 71.75         |
| Emotion regulation (Age 7)             | 4    | Yes            | Yes                              |                           | 70.15         |
| Child gender                           | 1&2  | Yes            | Yes                              |                           | 91.09         |
| OECD Poverty Indicator                 | 1&2  | Yes            | Yes                              |                           | 99.39         |
| OECD Poverty Indicator                 | 6    |                | Yes                              |                           | 60.92         |
| SDQ Emotional Subscale Age 3           | 2    | Yes            | Yes                              |                           | 76.61         |
| SDQ Emotional Subscale Age 5           | 3    | Yes            | Yes                              |                           | 76.54         |
| SDQ Emotional Subscale Age 7           | 4    | Yes            | Yes                              |                           | 69.91         |
| SDQ Emotional Subscale Age 11          | 5    | Yes            | Yes                              |                           | 66.53         |
| OECD Equivalised income                | 6    |                | Yes                              |                           | 60.92         |
| Respondent Age                         | 6    |                | Yes                              |                           | 58.28         |
| SDQ Peer Subscale age 3                | 2    | Yes            | Yes                              |                           | 76.14         |
| SDQ Peer Subscale age 5                | 3    | Yes            | Yes                              |                           | 76.49         |
| SDQ Peer Subscale age 7                | 4    | Yes            | Yes                              |                           | 69.95         |
| SDQ Peer Subscale age 11               | 5    | Yes            | Yes                              |                           | 66.57         |
| SDQ Peer Subscale age 14               | 6    | Yes            | Yes                              | Yes                       | 58.95         |
| SDQ Conduct Subscale age 14            | 6    |                | Yes                              | Yes                       | 58.93         |
| SDQ Hyperactivity Subscale age 14      | 6    |                | Yes                              |                           | 58.90         |
| SDQ Prosocial Subscale age 14          | 6    |                | Yes                              |                           | 58.94         |
| Parental Self Esteem                   | 1    |                | Yes                              |                           | 80.84         |
| Rutter Malaise Inventory               | 1    |                | Yes                              |                           | 92.51         |
| Languages spoken at home               | 1    |                |                                  | Yes                       | 96.39         |
| Respondent Ethnicity                   | 1    |                |                                  | Yes                       | 96.14         |
| Respondent in work                     | 6    |                | Yes                              |                           | 58.29         |
| Respondent Marital Status              | 6    |                | Yes                              |                           | 56.86         |
| Illness/Problem during Pregnancy       | 1    |                | Yes                              |                           | 96.10         |
| Current Treatment for Depression       | 6    |                | Yes                              |                           | 57.20         |
| Longstanding Illness                   | 6    |                | Yes                              |                           | 57.19         |
| Kessler K6 Distress Scale              | 6    |                | Yes                              |                           | 53.92         |
